# Supplementary material for: Synthesis of the large pore aluminophosphate STA-1 and its application as a catalyst for the Beckmann rearrangement of cyclohexanone oxime
Source: Royal Society of Chemistry journal article supplement (doi:10.1039/d4ta01132e), 2024-01-01
Supplement: d4ta01132e1.pdf [file d4ta01132e1.pdf]

## Supporting Information

### Synthesis of the Large Pore Aluminophosphate STA-1 and its Application as a Catalyst for the Beckmann Rearrangement of Cyclohexanone Oxime

Nuria Gonzalez-Camuñas,<sup>1,2</sup> Angel Cantin,<sup>1</sup> Daniel M. Dawson,<sup>3</sup> Magdalena M. Lozinska,<sup>3</sup> Joaquin Martínez-Triguero,<sup>1</sup> James Mattock,<sup>4</sup> Paul A. Cox,<sup>4</sup> Sharon E. Ashbrook,<sup>3</sup> Paul A. Wright<sup>3,\*</sup> and Fernando Rey<sup>1,\*</sup>

<sup>1</sup> *Instituto de Tecnología Química (ITQ), Universitat Politècnica de València (UPV) – Consejo Superior de Investigaciones Científicas (CSIC), 46022 Valencia, Spain*

<sup>2</sup> *Instituto de Tecnología Cerámica, Universidad Jaume I, Campus Universitario Riu Sec, Avda. Vicente Sos Baynat s/n, 12006, Castellón, Spain*

<sup>3</sup> *EaStCHEM School of Chemistry, University of St Andrews, Purdie Building, St Andrews, KY16 9ST, United Kingdom*

<sup>4</sup> *School of Pharmacy and Biomedical Sciences, University of Portsmouth, Portsmouth, PO1 2DT, United Kingdom*

\* email addresses: paw2@st-andrews.ac.uk; frey@itq.upv.es

### S1. Computational Modelling of N,N'-diethylbicyclo[2.2.2]oct-7-ene-2,3:5,6-dipyrrolidine (DEBOP)

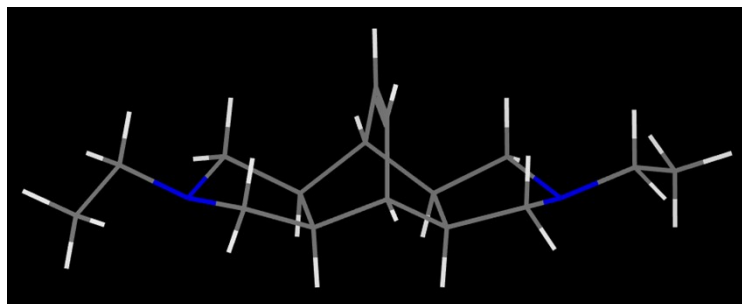

**Figure S1.** Modelled lowest energy configuration of the N,N'-diethylbicyclo[2.2.2]oct-7-ene-2,3:5,6-dipyrrolidine (DEBOP) OSDA, outside of the zeotype channel system.

**Table S1.** Calculated energies of 1 – 4 DEBOP OSDAs included per unit cell of  $\text{AlPO}_4$  STA-1 indicate that the filling of all four positions within the unit cell provide favourable binding. All Energies in kcal /mol of OSDA.

| Number of OSDAs | Total Energy of System | Total Free OSDA Energy | Total Binding Energy |
|-----------------|------------------------|------------------------|----------------------|
| 1               | -95.91                 | -56.90                 | -39.01               |
| 2               | -191.24                | -113.80                | -77.44               |
| 3               | -291.02                | -170.70                | -120.31              |
| 4               | -392.91                | -227.60                | -165.31              |

## S2. Characterisation of STA-1 (SAO Topology) Materials

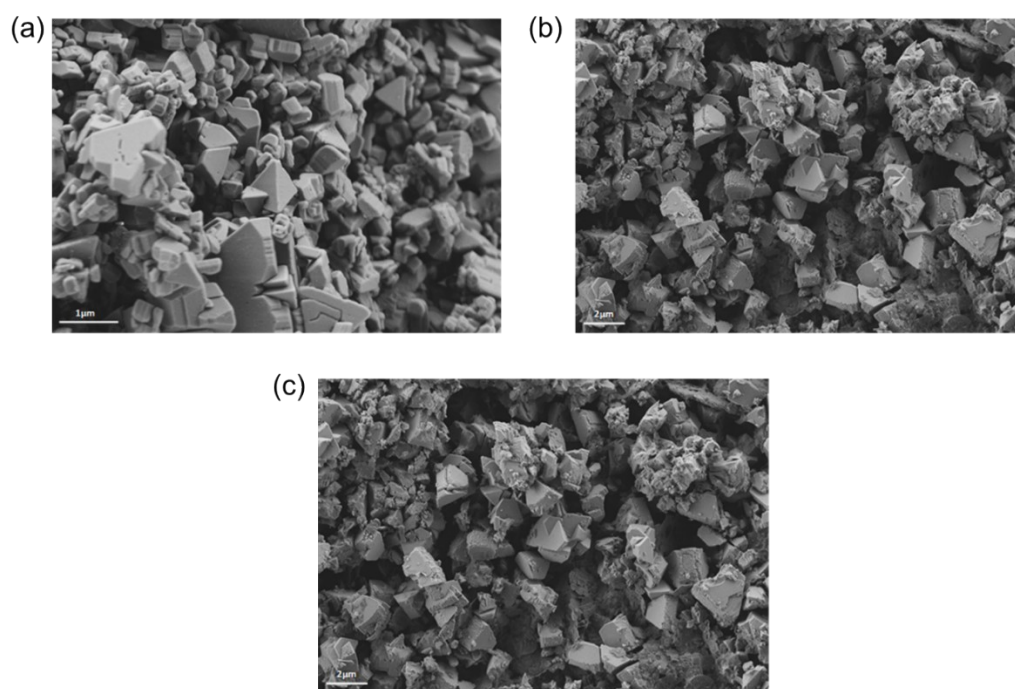

**Figure S2.** SEM images of (a) AlPO, (b) SAPO and (c) GeAPO STA-1 materials.

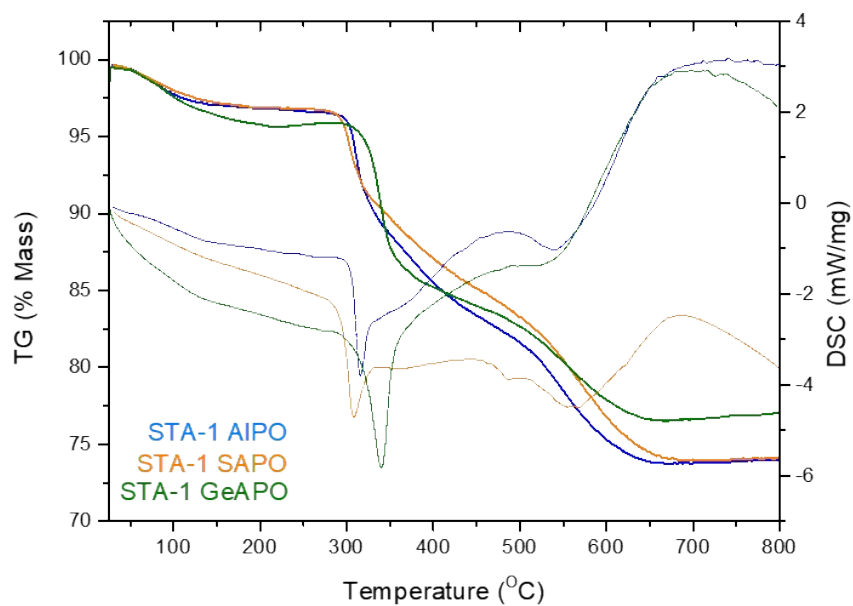

**Figure S3.** TG/DSC curves of AlPO, SAPO and GeAPO STA-1 materials.

**Table S2.** Chemical analysis of all STA-1 samples.

|                                | AlPO STA-1 | SAPO STA-1 | GeAPO STA-1 |
|--------------------------------|------------|------------|-------------|
| Al (wt%) <sup>a</sup>          | 16.76      | 17.39      | 17.33       |
| P (wt%) <sup>a</sup>           | 18.01      | 16.06      | 14.74       |
| M (=Si, Ge) (wt%) <sup>a</sup> | -          | 1.08       | 3.44        |
| C (wt%) <sup>b</sup>           | 16.85      | 16.68      | 15.06       |
| N (wt%) <sup>b</sup>           | 2.46       | 2.51       | 2.18        |
| H (wt%) <sup>b</sup>           | 2.81       | 2.79       | 2.76        |
| Al (atomic %) <sup>c</sup>     | 10.51      | -          | -           |
| P (atomic %) <sup>c</sup>      | 11.84      | -          | -           |
| F (atomic %) <sup>c</sup>      | 1.91       | -          | -           |

<sup>a</sup> From ICP-AES

<sup>b</sup> From CHN analysis

<sup>c</sup> From SEM-EDS

**Table S3.** Crystallographic details of dehydrated samples.

|                       | As made AIPO STA-1 (SAO)                                                             | Calcined AIPO STA-1 (SAO)                   |
|-----------------------|--------------------------------------------------------------------------------------|---------------------------------------------|
| Unit cell             | $\text{Al}_{28}\text{P}_{28}\text{O}_{112}\text{C}_{77}\text{N}_{9.6}\text{F}_{0.3}$ | $\text{Al}_{28}\text{P}_{28}\text{O}_{112}$ |
| Temperature/K         | 298                                                                                  | 298                                         |
| Space group           | $P -4 n 2$                                                                           | $P -4 n 2$                                  |
| X-ray source          | Cu $\text{K}_{\alpha_1}$                                                             | Cu $\text{K}_{\alpha_1}$                    |
| Diffractometer        | Stoe STADI P                                                                         | Stoe STADI P                                |
| Wavelength (Å)        | 1.54056                                                                              | 1.54056                                     |
| a = b / Å             | 13.3148(9)                                                                           | 13.74317(10)                                |
| c / Å                 | 22.0655(20)                                                                          | 21.8131(5)                                  |
| Volume/Å <sup>3</sup> | 3911.9(7)                                                                            | 4119.94(16)                                 |
| R <sub>p</sub>        | 0.0728                                                                               | 0.0407                                      |
| R <sub>wp</sub>       | 0.0987                                                                               | 0.0549                                      |
| $\chi^2$              | 7.181                                                                                | 4.783                                       |

**Table S4.** Al-O and P-O bond lengths and O-Al-O and O-P-O bond angles for refined structure of calcined and dehydrated AlPO STA-1 (SAO).

| Al-O and P-O / Å |           | O-Al-O and O-P-O (°) |           |
|------------------|-----------|----------------------|-----------|
| Al1 O1           | 1.685(15) | O1 Al1 O5            | 109.1(12) |
| Al1 O5           | 1.688(15) | O1 Al1 O6            | 109.1(11) |
| Al1 O6           | 1.722(16) | O1 Al1 O7            | 110.8(11) |
| Al1 O7           | 1.683(16) | O5 Al1 O6            | 110.5(11) |
| Al2 O9           | 1.740(14) | O5 Al1 O7            | 110.5(11) |
| Al2 O11          | 1.733(15) | O6 Al1 O7            | 108.9(11) |
| Al2 O12          | 1.692(15) | O9 Al2 O11           | 107.1(11) |
| Al2 O13          | 1.710(15) | O9 Al2 O12           | 107.9(10) |
| Al3 O3           | 1.705(15) | O9 Al2 O13           | 111.3(11) |
| Al3 O4           | 1.712(15) | O11 Al2 O12          | 109.1(11) |
| Al3 O10          | 1.716(16) | O11 Al2 O13          | 111.4(11) |
| Al3 O14          | 1.686(15) | O12 Al2 O13          | 109.9(11) |
| Al4 O2           | 1.700(10) | O3 Al3 O4            | 108.9(11) |
| Al4 O2           | 1.700(10) | O3 Al3 O10           | 107.8(12) |
| Al4 O8           | 1.703(11) | O3 Al3 O14           | 110.8(11) |
| Al4 O8           | 1.703(11) | O4 Al3 O10           | 110.7(11) |
| P1 O1            | 1.529(15) | O4 Al3 O14           | 109.7(11) |
| P1 O2            | 1.538(14) | O10 Al3 O14          | 109.0(11) |
| P1 O3            | 1.552(14) | O2 Al4 O2            | 112.4(13) |
| P1 O4            | 1.564(14) | O2 Al4 O8            | 108.6(7)  |
| P2 O6            | 1.533(14) | O2 Al4 O8            | 107.3(7)  |
| P2 O8            | 1.563(14) | O2 Al4 O8            | 107.3(7)  |
| P2 O9            | 1.564(13) | O2 Al4 O8            | 108.6(7)  |
| P2 O12           | 1.534(14) | O8 Al4 O8            | 112.7(13) |
| P3 O5            | 1.546(14) | O1 P1 O2             | 112.7(13) |
| P3 O7            | 1.505(15) | O1 P1 O3             | 110.1(12) |
| P3 O10           | 1.505(14) | O1 P1 O4             | 108.0(12) |
| P3 O11           | 1.563(15) | O2 P1 O3             | 107.6(12) |
| P4 O13           | 1.546(10) | O2 P1 O4             | 110.0(12) |
| P4 O13           | 1.546(10) | O3 P1 O4             | 108.4(12) |
| P4 O14           | 1.535(10) | O6 P2 O8             | 110.2(12) |
| P4 O14           | 1.535(10) | O6 P2 O9             | 108.8(12) |
|                  |           | O6 P2 O12            | 110.7(12) |
|                  |           | O8 P2 O9             | 110.6(12) |
|                  |           | O8 P2 O12            | 107.6(11) |
|                  |           | O9 P2 O12            | 108.9(11) |
|                  |           | O5 P3 O7             | 106.7(13) |
|                  |           | O5 P3 O10            | 110.8(13) |
|                  |           | O5 P3 O11            | 107.4(12) |
|                  |           | O7 P3 O10            | 107.1(13) |
|                  |           | O7 P3 O11            | 114.8(13) |
|                  |           | O10 P3 O11           | 110.0(11) |
|                  |           | O13 P4 O13           | 112.7(14) |
|                  |           | O13 P4 O14           | 109.9(8)  |
|                  |           | O13 P4 O14           | 107.2(8)  |
|                  |           | O13 P4 O14           | 107.2(8)  |

**Table S5.** Fractional atomic coordinates, occupancies, multiplicities and isotropic displacement parameters (in Å<sup>2</sup>) for calcined and dehydrated AlPO STA-1 (SAO).

|     | Type | x          | y           | z         | Occup. | Mult. | Uiso      |
|-----|------|------------|-------------|-----------|--------|-------|-----------|
| P1  | P    | 0.3890(12) | 0.1167(12)  | 0.1330(7) | 1.0    | 8     | 0.0077(4) |
| P2  | P    | 0.1105(11) | 0.1179(11)  | 0.1888(6) | 1.0    | 8     | 0.0077(4) |
| P3  | P    | 0.2037(11) | -0.1124(12) | 0.0574(7) | 1.0    | 8     | 0.0077(4) |
| P4  | P    | 0.2957(10) | -0.2043(10) | 0.25      | 1.0    | 4     | 0.0077(4) |
| Al1 | Al   | 0.2039(12) | 0.1145(13)  | 0.0591(8) | 1.0    | 8     | 0.0077(4) |
| Al2 | Al   | 0.1121(13) | -0.1150(12) | 0.1883(7) | 1.0    | 8     | 0.0077(4) |
| Al3 | Al   | 0.3888(13) | -0.1110(13) | 0.1350(7) | 1.0    | 8     | 0.0077(4) |
| Al4 | Al   | 0.2951(11) | 0.2049(11)  | 0.25      | 1.0    | 4     | 0.0077(4) |
| O1  | O    | 0.3198(10) | 0.1375(15)  | 0.0798(7) | 1.0    | 8     | 0.0077(4) |
| O2  | O    | 0.3687(15) | 0.1812(12)  | 0.1892(5) | 1.0    | 8     | 0.0077(4) |
| O3  | O    | 0.3792(10) | 0.0091(10)  | 0.1536(6) | 1.0    | 8     | 0.0077(4) |
| O4  | O    | 0.4954(10) | 0.1336(11)  | 0.1098(6) | 1.0    | 8     | 0.0077(4) |
| O5  | O    | 0.1937(10) | -0.0040(10) | 0.0397(6) | 1.0    | 8     | 0.0077(4) |
| O6  | O    | 0.1285(14) | 0.1367(14)  | 0.1205(6) | 1.0    | 8     | 0.0077(4) |
| O7  | O    | 0.1702(10) | 0.1861(11)  | 0.0002(7) | 1.0    | 8     | 0.0077(4) |
| O8  | O    | 0.1777(11) | 0.1846(12)  | 0.2286(9) | 1.0    | 8     | 0.0077(4) |
| O9  | O    | 0.1309(11) | 0.0081(10)  | 0.2028(6) | 1.0    | 8     | 0.0077(4) |
| O10 | O    | 0.3056(10) | -0.1348(15) | 0.0783(7) | 1.0    | 8     | 0.0077(4) |
| O11 | O    | 0.1301(13) | -0.1328(15) | 0.1105(6) | 1.0    | 8     | 0.0077(4) |
| O12 | O    | 0.0048(10) | 0.1413(10)  | 0.2059(6) | 1.0    | 8     | 0.0077(4) |
| O13 | O    | 0.1889(11) | -0.1858(12) | 0.2309(9) | 1.0    | 8     | 0.0077(4) |
| O14 | O    | 0.3638(14) | -0.1819(12) | 0.1961(5) | 1.0    | 8     | 0.0077(4) |

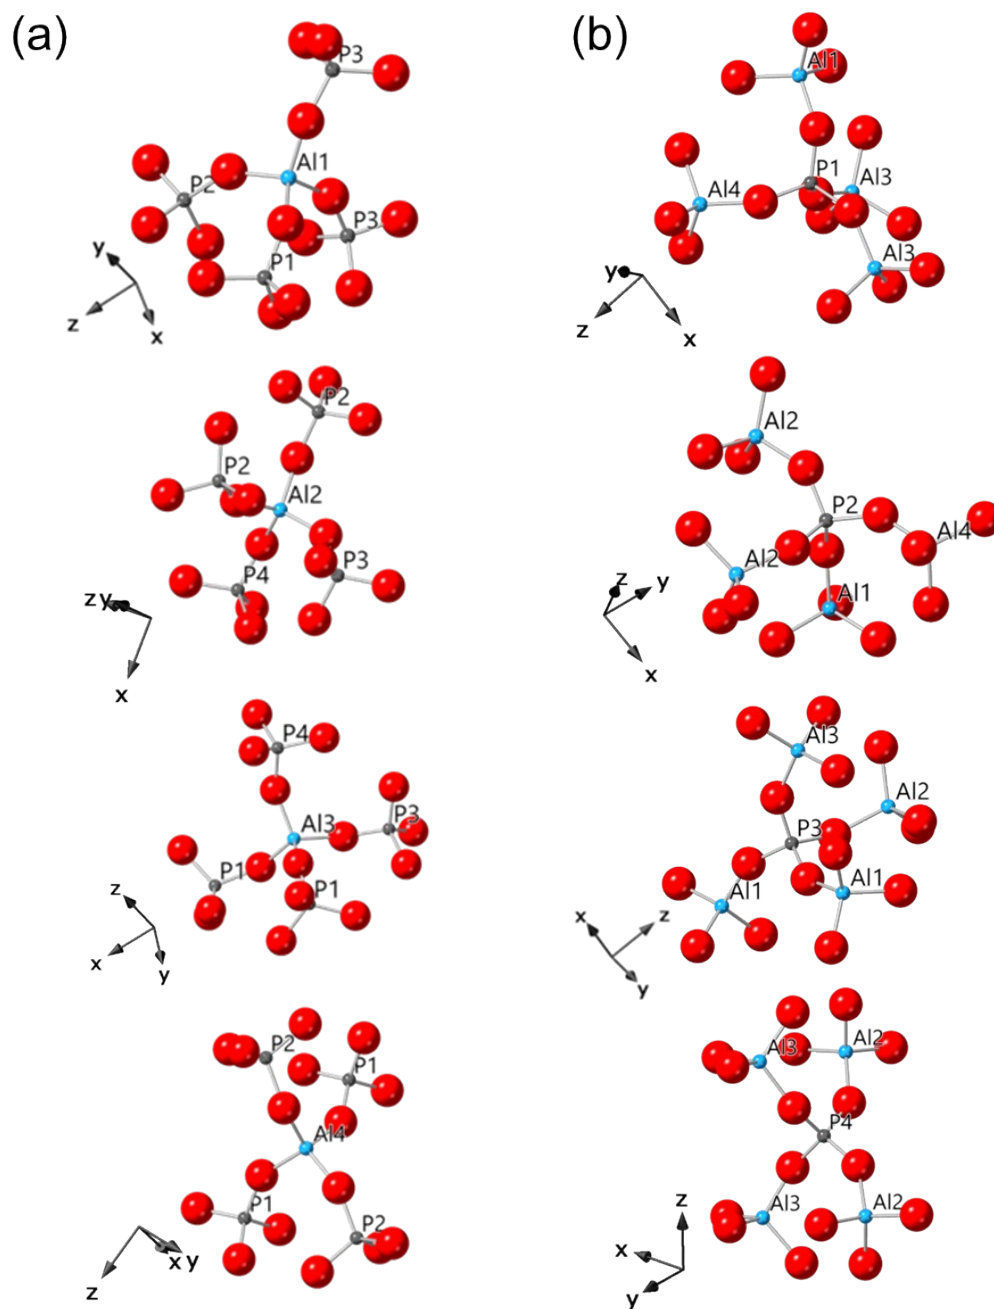

**Figure S4.** T-site nearest neighbour environments in AlPO<sub>4</sub> STA-1 for (a) Al atoms and (b) P atoms. (Al = blue spheres, P = grey spheres and O = red spheres)

**Figure S5.** Fluoride ion located in the cage of the aluminophosphate fluoride UiO-7, which gives a  $^{19}\text{F}$  MAS NMR signal at  $-109$  ppm.[1,2]

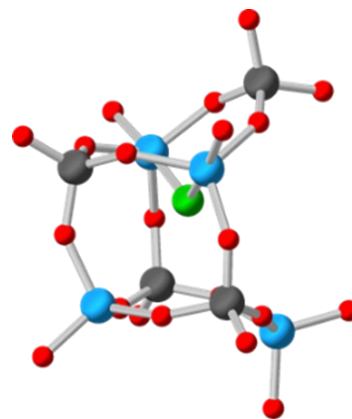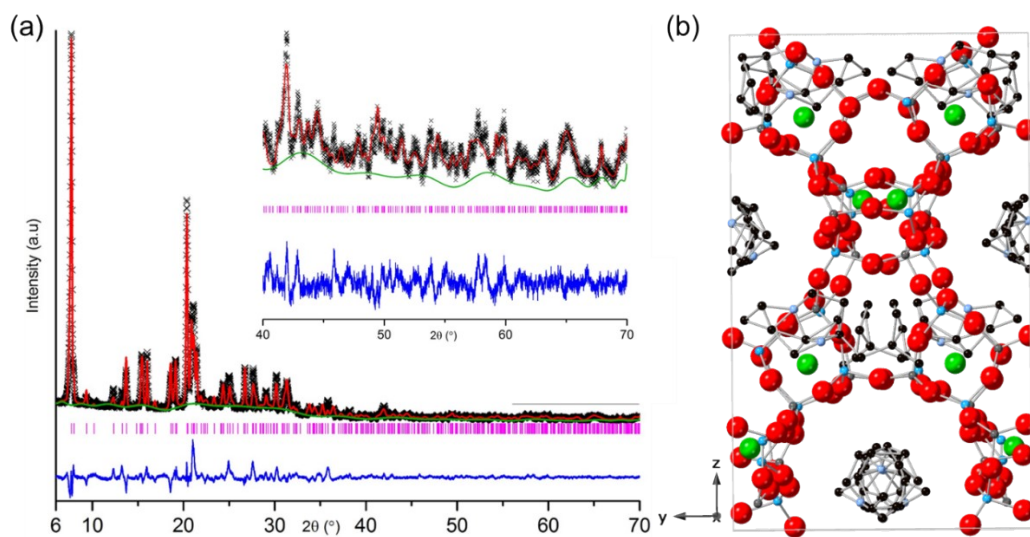

**Figure S6.** Rietveld plot of PXRD data ( $\lambda = 1.54056 \text{ \AA}$ ,  $T = 298 \text{ K}$ ) of as-made and dehydrated AlPO STA-1 (SAO) (Observed – black, calculated – red, difference – blue, phase – pink and background – green). (b) Structure of as-made and dehydrated ( $P-4n2$  symmetry) AlPO STA-1 (SAO) obtained from Rietveld refinement (Al = blue spheres, P = grey spheres, O = red spheres, C = black spheres, N = blue spheres and F = green spheres).



**Table S6.** Al-O and P-O bond lengths and O-Al-O and O-P-O bond angles for refined structure of as-made and dehydrated AlPO STA-1 (SAO).

| Al-O and P-O / Å |             | O-Al-O and O-P-O (°) |            |
|------------------|-------------|----------------------|------------|
| Al1 O1           | 1.67555(10) | O1 Al1 O5            | 105.189(1) |
| Al1 O5           | 1.72880(10) | O1 Al1 O6            | 106.231(5) |
| Al1 O6           | 1.73167(11) | O1 Al1 O7            | 127.073(1) |
| Al1 O7           | 1.66261(9)  | O5 Al1 O6            | 102.817(2) |
| Al2 O9           | 1.70192(10) | O5 Al1 O7            | 107.445(4) |
| Al2 O11          | 1.68039(15) | O6 Al1 O7            | 105.689(5) |
| Al2 O12          | 1.72438(11) | O9 Al2 O11           | 111.103(2) |
| Al2 O13          | 1.72648(9)  | O9 Al2 O12           | 108.373(1) |
| Al3 O3           | 1.67229(11) | O9 Al2 O13           | 110.133(4) |
| Al3 O4           | 1.69841(10) | O11 Al2 O12          | 107.592(1) |
| Al3 O10          | 1.79777(10) | O11 Al2 O13          | 119.055(3) |
| Al3 O14          | 1.74307(10) | O12 Al2 O13          | 99.514(2)  |
| Al4 O2           | 1.69747(10) | O3 Al3 O4            | 129.121(0) |
| Al4 O2           | 1.69747(10) | O3 Al3 O10           | 103.213(0) |
| Al4 O8           | 1.68314(10) | O3 Al3 O14           | 118.639(3) |
| Al4 O8           | 1.68314(10) | O4 Al3 O10           | 100.893(4) |
| P1 O1            | 1.56632(9)  | O4 Al3 O14           | 98.117(3)  |
| P1 O2            | 1.47179(10) | O10 Al3 O14          | 103.096(5) |
| P1 O3            | 1.72738(11) | O2 Al4 O2            | 110.703(5) |
| P1 O4            | 1.50347(9)  | O2 Al4 O8            | 111.792(5) |
| P2 O6            | 1.53726(13) | O2 Al4 O8            | 106.345(2) |
| P2 O8            | 1.52553(8)  | O2 Al4 O8            | 106.345(2) |
| P2 O9            | 1.53151(9)  | O2 Al4 O8            | 111.792(5) |
| P2 O12           | 1.51913(10) | O8 Al4 O8            | 109.944(1) |
| P3 O5            | 1.52901(9)  | O1 P1 O2             | 109.413(5) |
| P3 O7            | 1.51110(11) | O1 P1 O3             | 114.475(0) |
| P3 O10           | 1.50017(8)  | O1 P1 O4             | 109.951(5) |
| P3 O11           | 1.55385(9)  | O2 P1 O3             | 108.589(3) |
| P4 O13           | 1.49668(8)  | O2 P1 O4             | 119.189(2) |
| P4 O13           | 1.49668(8)  | O3 P1 O4             | 94.745(1)  |
| P4 O14           | 1.57515(9)  | O6 P2 O8             | 109.061(4) |
| P4 O14           | 1.57515(9)  | O6 P2 O9             | 108.627(1) |
|                  |             | O6 P2 O12            | 103.405(0) |
|                  |             | O8 P2 O9             | 113.158(3) |
|                  |             | O8 P2 O12            | 107.538(1) |
|                  |             | O9 P2 O12            | 114.519(1) |
|                  |             | O5 P3 O7             | 101.491(4) |
|                  |             | O5 P3 O10            | 112.519(1) |
|                  |             | O5 P3 O11            | 110.358(1) |
|                  |             | O7 P3 O10            | 107.540(3) |
|                  |             | O7 P3 O11            | 120.454(4) |
|                  |             | O10 P3 O11           | 104.670(5) |
|                  |             | O13 P4 O13           | 119.808(1) |
|                  |             | O13 P4 O14           | 102.301(5) |
|                  |             | O13 P4 O14           | 114.578(2) |
|                  |             | O13 P4 O14           | 114.578(2) |
|                  |             | O13 P4 O14           | 102.301(5) |
|                  |             | O14 P4 O14           | 102.319(5) |

**Table S7.** Fractional atomic coordinates, occupancies, multiplicities and isotropic displacement parameters (in Å<sup>2</sup>) for as-made and dehydrated AlPO STA-1 (SAO).

|     | Type | x        | y        | z       | Occup.  | Mult. | Uiso    |
|-----|------|----------|----------|---------|---------|-------|---------|
| P1  | P    | 0.39211  | 0.15616  | 0.13658 | 1.0     | 8     | 0.00824 |
| P2  | P    | 0.10433  | 0.12339  | 0.18981 | 1.0     | 8     | 0.00824 |
| P3  | P    | 0.21688  | -0.08312 | 0.05404 | 1.0     | 8     | 0.00824 |
| P4  | P    | 0.29651  | -0.20349 | 0.25    | 1.0     | 4     | 0.00824 |
| Al1 | Al   | 0.20218  | 0.14954  | 0.05977 | 1.0     | 8     | 0.00824 |
| Al2 | Al   | 0.12421  | -0.10084 | 0.17968 | 1.0     | 8     | 0.00824 |
| Al3 | Al   | 0.4075   | -0.09623 | 0.1383  | 1.0     | 8     | 0.00824 |
| Al4 | Al   | 0.28042  | 0.21958  | 0.25    | 1.0     | 4     | 0.00824 |
| O1  | O    | 0.31263  | 0.18785  | 0.08786 | 1.0     | 8     | 0.00824 |
| O2  | O    | 0.36784  | 0.20449  | 0.19475 | 1.0     | 8     | 0.00824 |
| O3  | O    | 0.40128  | 0.02816  | 0.14807 | 1.0     | 8     | 0.00824 |
| O4  | O    | 0.49629  | 0.1668   | 0.11108 | 1.0     | 8     | 0.00824 |
| O5  | O    | 0.22243  | 0.02756  | 0.03587 | 1.0     | 8     | 0.00824 |
| O6  | O    | 0.12312  | 0.13398  | 0.12137 | 1.0     | 8     | 0.00824 |
| O7  | O    | 0.13357  | 0.2064   | 0.00698 | 1.0     | 8     | 0.00824 |
| O8  | O    | 0.16298  | 0.20474  | 0.22324 | 1.0     | 8     | 0.00824 |
| O9  | O    | 0.13329  | 0.01685  | 0.20927 | 1.0     | 8     | 0.00824 |
| O10 | O    | 0.3126   | -0.12002 | 0.08215 | 1.0     | 8     | 0.00824 |
| O11 | O    | 0.1359   | -0.09873 | 0.10386 | 1.0     | 8     | 0.00824 |
| O12 | O    | -0.00664 | 0.14761  | 0.19633 | 1.0     | 8     | 0.00824 |
| O13 | O    | 0.19681  | -0.18351 | 0.22108 | 1.0     | 8     | 0.00824 |
| O14 | O    | 0.37218  | -0.17424 | 0.19805 | 1.0     | 8     | 0.00824 |
| C1  | C    | 1.03265  | 0.62325  | 0.45801 | 0.60148 | 8     | 0.09124 |
| C2  | C    | 0.95265  | 0.54294  | 0.45512 | 0.60148 | 8     | 0.09124 |
| C3  | C    | 1.00426  | 0.44768  | 0.43449 | 0.60148 | 8     | 0.09124 |
| C4  | C    | 1.0565   | 0.46316  | 0.37115 | 0.60148 | 8     | 0.09124 |
| C5  | C    | 1.03621  | 0.56789  | 0.34679 | 0.60148 | 8     | 0.09124 |
| C6  | C    | 1.0807   | 0.63954  | 0.39355 | 0.60148 | 8     | 0.09124 |
| C7  | C    | 1.06749  | 0.75248  | 0.38342 | 0.60148 | 8     | 0.09124 |
| C8  | C    | 1.00164  | 0.72964  | 0.47677 | 0.60148 | 8     | 0.09124 |
| C9  | C    | 1.01786  | 0.374    | 0.33338 | 0.60148 | 8     | 0.09124 |
| C10 | C    | 0.93847  | 0.35527  | 0.42313 | 0.60148 | 8     | 0.09124 |
| C11 | C    | 0.94935  | 0.20938  | 0.35464 | 0.60148 | 8     | 0.09124 |
| C12 | C    | 0.92327  | 0.13345  | 0.40421 | 0.60148 | 8     | 0.09124 |
| C13 | C    | 1.05985  | 0.89847  | 0.4525  | 0.60148 | 8     | 0.09124 |
| C14 | C    | 1.14536  | 0.95749  | 0.42388 | 0.60148 | 8     | 0.09124 |
| C15 | C    | 0.92304  | 0.58367  | 0.34846 | 0.60148 | 8     | 0.09124 |
| C16 | C    | 0.88082  | 0.57163  | 0.40354 | 0.60148 | 8     | 0.09124 |
| N1  | N    | 1.07356  | 0.79194  | 0.44523 | 0.60148 | 8     | 0.09124 |
| N2  | N    | 0.99598  | 0.29844  | 0.37902 | 0.60148 | 8     | 0.09124 |
| F3  | F    | 0.24767  | -0.0578  | 0.16537 | 0.03997 | 8     | 0.05    |

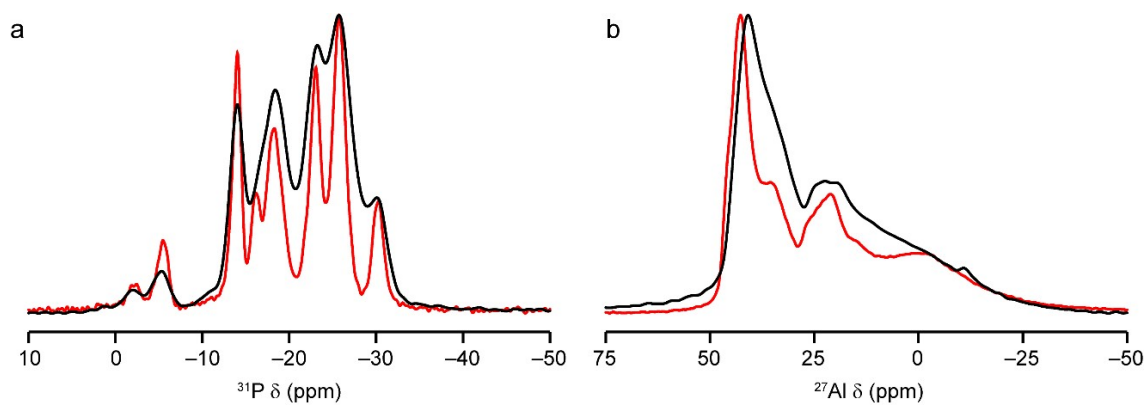

**Figure S7.** (a)  $^{31}\text{P}$  (9.4 T, 14 kHz MAS) and (b)  $^{27}\text{Al}$  (14.1 T, 14 kHz MAS) NMR spectra of (black) SAPO STA-1 and (red) AlPO-STA-1.

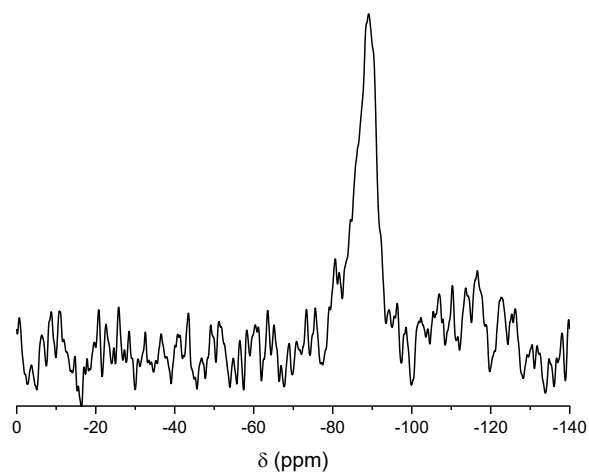

**Figure S8.**  $^{29}\text{Si}$  (9.4 T, 14 kHz MAS) NMR spectrum of SAPO STA-1.

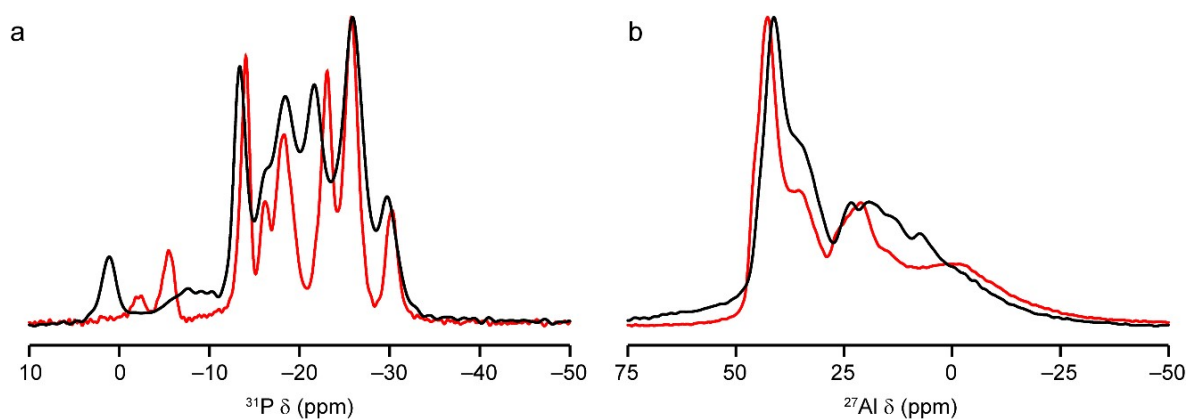

**Figure S9.** (a)  $^{31}\text{P}$  (9.4 T, 14 kHz MAS) and (b)  $^{27}\text{Al}$  (14.1 T, 14 kHz MAS) NMR spectra of (black) GeAPO STA-1 and (red) AlPO-STA-1.

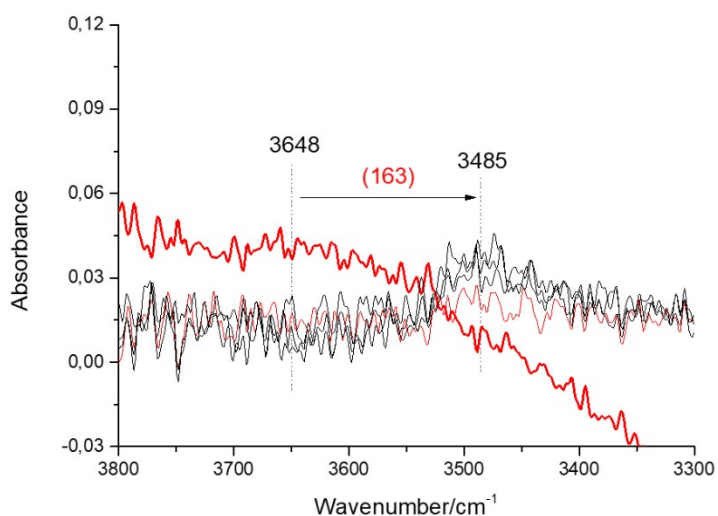

**Figure S10.** IR spectrum of dehydrated AlPO STA-1 in the hydroxyl region (red, bold) and difference spectra after low temperature adsorption of CO at different pressures.

### S3. Comparative studies with SAPO-37

For the synthesis of SAPO-37, 0.2571 g of water, 0.6918 g phosphoric acid (85 wt %) and 0.1802 g of fumed silica were mixed at RT for 30 mins. Then 0.6118 g of alumina (76.5 wt %) was added very slowly with vigorous stirring. The mixture was stirred for further 4 hours at RT and then 3.0506 g tetrapropylammonium hydroxide (40% solution) and 0.0547 g tetramethylammonium hydroxide were added. The final gel pH was approximately 7. The mixture was then stirred for further 2 hours and the gel was sealed in a Teflon-lined autoclave and heated at 463 K for 48 h. The overall gel composition was  $2 \text{ H}_3\text{PO}_4 : \text{SiO}_2 : 2 \text{ Al}(\text{OH})_3 : 0.05 \text{ TMAOH} : 2 \text{ TPAOH} : 50 \text{ H}_2\text{O}$ . The resulting solid was isolated by centrifugation, washed with distilled water and dried at 333 K overnight. In order to remove the OSDA, the solid was calcined at 923 K for 12 h in air. ICP-AES indicated an inorganic composition of  $\text{Al}_{1.02}\text{Si}_{0.34}\text{P}_{0.60}\text{O}_4$ .

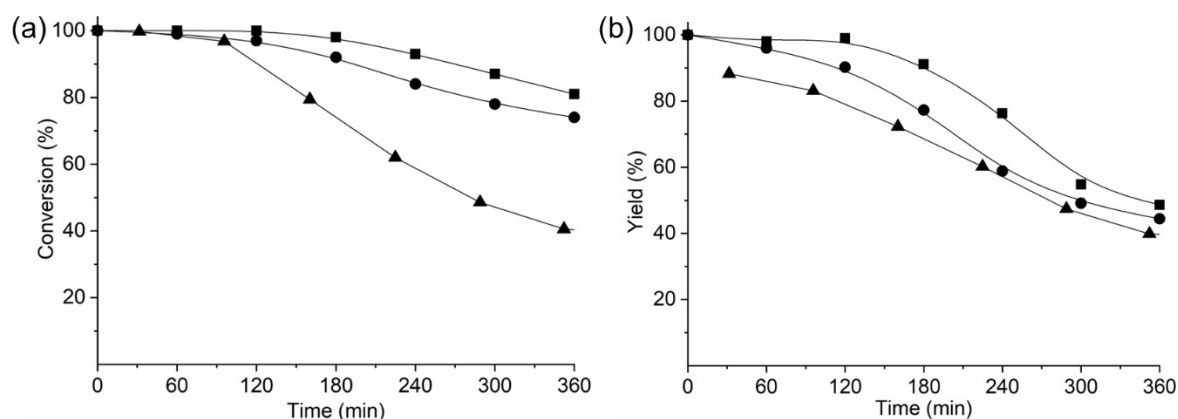

**Figure S11.** Comparison of catalytic activity of AlPO-SAO and SAPO-37 with different Si content, at 598 K: AlPO STA-1 (■), SAPO-37 (●; high Si content) and SAPO-37 (▲; low Si content; from *Angew. Chem. Int. Ed.* 2020, 59, 19561–19569). Conversion of cyclohexanone oxime and yield to  $\epsilon$ -caprolactam (10 g/L solution of cyclohexanone oxime in ethanol at a WHSV of  $0.79 \text{ g}_{\text{reactant}} \cdot \text{g}_{\text{cat}}^{-1} \cdot \text{h}^{-1}$ ) at 598 K as a function of time on stream.

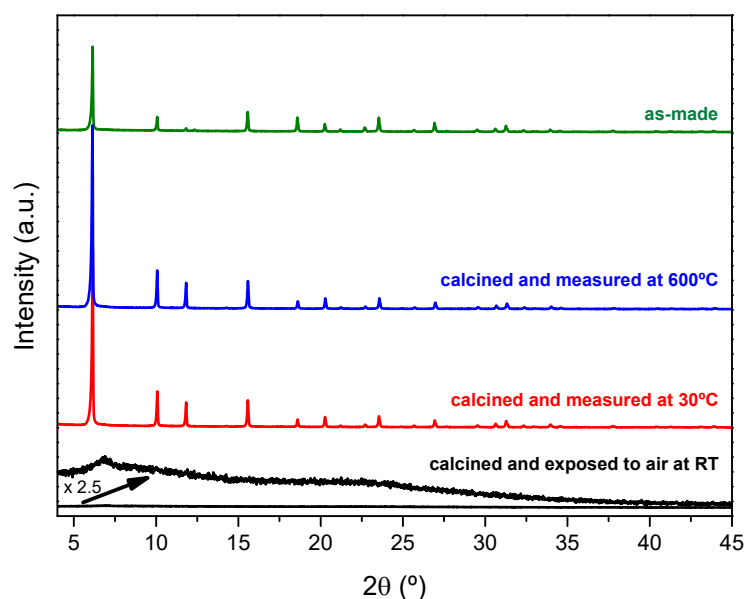

**Figure S12.** PXRD patterns of the SAPO-37 sample collected using an Anton-Paar XRK-900 reaction chamber attached to a Malvern-Panalytical Empyrean diffractometer with a PIXcel detector. Calcination was performed under a constant flow of a dried 1:4 v/v  $\text{O}_2/\text{N}_2$  stream.

## References

- [1] D. E. Akporiaye, H. Fjellvag, E. N. Halvorsen, J. Hustveit, A. Karlsson and K. P. Lillerud, UiO-7: A New Aluminophosphate Phase Solved by Simulated Annealing and High Resolution Powder Diffraction, *J. Phys. Chem.* 1996, **100**, 16641–16646
- [2] A. Bailly, J. P. Amoureux, J. W. Wiench and M. Pruski, Structural Analysis of ZON-Type Aluminophosphates by Solid State NMR, *J. Phys. Chem. B*, 2001, **105**, 773–776.
